# Supplementary material for: Botanical Collection Patterns and Conservation Categories of the Most Traded Timber Species from the Ecuadorian Amazon: The Role of Protected Areas
Source: MDPI journal article supplement (doi:10.3390/plants12183327), 2023-09-20
Supplement: s1 [file s1]

Table S1. List of the 214 analysed species with number of records and current IUCN category

| ID | Specie                           | Records | IUCN category |
|----|----------------------------------|---------|---------------|
| 1  | <i>Guarea kunthiana</i>          | 481     | LC            |
| 2  | <i>Grias neuberthii</i>          | 329     | LC            |
| 3  | <i>Mayna odorata</i>             | 322     | LC            |
| 4  | <i>Guarea macrophylla</i>        | 296     | LC            |
| 5  | <i>Tapirira guianensis</i>       | 287     | LC            |
| 6  | <i>Dacryodes peruviana</i>       | 220     | LC            |
| 7  | <i>Matisia malacocalyx</i>       | 206     | LC            |
| 8  | <i>Minquartia guianensis</i>     | 192     | LC            |
| 9  | <i>Alchornea glandulosa</i>      | 175     | LC            |
| 10 | <i>Apeiba membranacea</i>        | 174     | LC            |
| 11 | <i>Pseudolmedia laevis</i>       | 168     | LC            |
| 12 | <i>Banara guianensis</i>         | 167     | LC            |
| 13 | <i>Micropholis venulosa</i>      | 160     | LC            |
| 14 | <i>Nectandra membranacea</i>     | 154     | LC            |
| 15 | <i>Guarea guidonia</i>           | 152     | LC            |
| 16 | <i>Symphonia globulifera</i>     | 151     | LC            |
| 17 | <i>Ocotea javitensis</i>         | 148     | LC            |
| 18 | <i>Pseudolmedia laevigata</i>    | 147     | LC            |
| 19 | <i>Piptocoma discolor</i>        | 146     | LC            |
| 20 | <i>Trema micrantha</i>           | 146     | NE            |
| 21 | <i>Terminalia amazonia</i>       | 140     | LC            |
| 22 | <i>Batocarpus orinocensis</i>    | 138     | LC            |
| 23 | <i>Clarisia biflora</i>          | 137     | LC            |
| 24 | <i>Inga edulis</i>               | 137     | LC            |
| 25 | <i>Huertia glandulosa</i>        | 134     | LC            |
| 26 | <i>Caryodendron orinocense</i>   | 132     | LC            |
| 27 | <i>Virola duckei</i>             | 132     | LC            |
| 28 | <i>Ficus maxima</i>              | 130     | LC            |
| 29 | <i>Browneopsis ucayalina</i>     | 128     | LC            |
| 30 | <i>Pourouma minor</i>            | 128     | LC            |
| 31 | <i>Virola pavonis</i>            | 127     | LC            |
| 32 | <i>Pourouma cecropiifolia</i>    | 125     | LC            |
| 33 | <i>Vernonanthura patens</i>      | 125     | LC            |
| 34 | <i>Pouteria caimito</i>          | 124     | LC            |
| 35 | <i>Osteophloeum platyspermum</i> | 122     | LC            |
| 36 | <i>Cedrelinga cateniformis</i>   | 117     | LC            |
| 37 | <i>Solanum grandiflorum</i>      | 117     | LC            |
| 38 | <i>Virola flexuosa</i>           | 117     | LC            |
| 39 | <i>Celtis schippii</i>           | 116     | LC            |
| 40 | <i>Ladenbergia oblongifolia</i>  | 116     | LC            |
| 41 | <i>Virola sebifera</i>           | 110     | LC            |
| 42 | <i>Cedrela odorata</i>           | 108     | VU            |
| 43 | <i>Turpinia occidentalis</i>     | 107     | LC            |

|    |                                 |     |    |
|----|---------------------------------|-----|----|
| 44 | <i>Cordia alliodora</i>         | 106 | LC |
| 45 | <i>Metteniusa tessmanniana</i>  | 106 | LC |
| 46 | <i>Brosimum guianense</i>       | 103 | LC |
| 47 | <i>Cabralea canjerana</i>       | 102 | LC |
| 48 | <i>Casearia arborea</i>         | 102 | LC |
| 49 | <i>Vismia baccifera</i>         | 102 | LC |
| 50 | <i>Clarisia racemosa</i>        | 101 | LC |
| 51 | <i>Apeiba aspera</i>            | 100 | NE |
| 52 | <i>Nectandra reticulata</i>     | 100 | LC |
| 53 | <i>Matisia cordata</i>          | 98  | LC |
| 54 | <i>Trichilia pleeana</i>        | 98  | LC |
| 55 | <i>Guarea gomma</i>             | 96  | LC |
| 56 | <i>Guarea purusana</i>          | 91  | LC |
| 57 | <i>Pseudolmedia rigida</i>      | 89  | LC |
| 58 | <i>Heliocarpus americanus</i>   | 88  | LC |
| 59 | <i>Pouteria multiflora</i>      | 88  | NE |
| 60 | <i>Abarema jupunba</i>          | 87  | LC |
| 61 | <i>Terminalia oblonga</i>       | 87  | LC |
| 62 | <i>Cupania cinerea</i>          | 86  | LC |
| 63 | <i>Ilex guayusa</i>             | 85  | LC |
| 64 | <i>Drimys granadensis</i>       | 84  | NE |
| 65 | <i>Jacaranda copaia</i>         | 83  | LC |
| 66 | <i>Couropita guianensis</i>     | 82  | LC |
| 67 | <i>Myrsine coriacea</i>         | 82  | NE |
| 68 | <i>Cecropia sciadophylla</i>    | 81  | LC |
| 69 | <i>Chimarrhis glabriflora</i>   | 81  | LC |
| 70 | <i>Simarouba amara</i>          | 80  | LC |
| 71 | <i>Hymenaea oblongifolia</i>    | 79  | LC |
| 72 | <i>Gustavia macarenensis</i>    | 76  | LC |
| 73 | <i>Miconia prasina</i>          | 76  | LC |
| 74 | <i>Brosimum utile</i>           | 71  | LC |
| 75 | <i>Ochroma pyramidale</i>       | 69  | LC |
| 76 | <i>Parkia multijuga</i>         | 69  | LC |
| 77 | <i>Sloanea fragrans</i>         | 69  | LC |
| 78 | <i>Cestrum racemosum</i>        | 68  | LC |
| 79 | <i>Calliandra angustifolia</i>  | 67  | LC |
| 80 | <i>Chrysophyllum argenteum</i>  | 66  | LC |
| 81 | <i>Vochysia brachyloba</i>      | 65  | LC |
| 82 | <i>Erythrina poeppigiana</i>    | 64  | LC |
| 83 | <i>Podocarpus oleifolius</i>    | 64  | LC |
| 84 | <i>Schefflera morototoni</i>    | 63  | NE |
| 85 | <i>Triplaris dugandii</i>       | 63  | LC |
| 86 | <i>Calycophyllum spruceanum</i> | 62  | NE |
| 87 | <i>Cespedesia spathulata</i>    | 61  | LC |
| 88 | <i>Erismia uncinatum</i>        | 61  | LC |
| 89 | <i>Ceiba samauma</i>            | 60  | NE |

|     |                                |    |    |
|-----|--------------------------------|----|----|
| 90  | <i>Ceiba pentandra</i>         | 59 | LC |
| 91  | <i>Poulsenia armata</i>        | 58 | LC |
| 92  | <i>Boehmeria caudata</i>       | 57 | LC |
| 93  | <i>Morella pubescens</i>       | 57 | LC |
| 94  | <i>Calophyllum brasiliense</i> | 54 | LC |
| 95  | <i>Genipa americana</i>        | 54 | LC |
| 96  | <i>Laetia procera</i>          | 54 | NE |
| 97  | <i>Myroxylon balsamum</i>      | 54 | LC |
| 98  | <i>Persea americana</i>        | 52 | LC |
| 99  | <i>Calypttranthes plicata</i>  | 50 | NE |
| 100 | <i>Trattinnickia glaziovii</i> | 49 | LC |
| 101 | <i>Vallea stipularis</i>       | 48 | LC |
| 102 | <i>Myrcianthes rhopaloides</i> | 47 | LC |
| 103 | <i>Capirona decorticans</i>    | 46 | LC |
| 104 | <i>Protium fimbriatum</i>      | 44 | NE |
| 105 | <i>Simira cordifolia</i>       | 42 | LC |
| 106 | <i>Clusia multiflora</i>       | 41 | LC |
| 107 | <i>Cassia cowanii</i>          | 40 | LC |
| 108 | <i>Endlicheria gracilis</i>    | 39 | LC |
| 109 | <i>Aniba riparia</i>           | 38 | LC |
| 110 | <i>Schizolobium parahyba</i>   | 37 | LC |
| 111 | <i>Theobroma bicolor</i>       | 37 | LC |
| 112 | <i>Elaeagia utilis</i>         | 35 | LC |
| 113 | <i>Rollinia mucosa</i>         | 35 | NE |
| 114 | <i>Hedyosmum cuatrecazanum</i> | 34 | LC |
| 115 | <i>Mauria heterophylla</i>     | 34 | LC |
| 116 | <i>Sapium stylare</i>          | 33 | NE |
| 117 | <i>Sloanea grandiflora</i>     | 33 | LC |
| 118 | <i>Piptadenia pteroclada</i>   | 32 | LC |
| 119 | <i>Vitex cymosa</i>            | 32 | LC |
| 120 | <i>Artocarpus altilis</i>      | 31 | NE |
| 121 | <i>Crescentia cujete</i>       | 31 | LC |
| 122 | <i>Jacaratia spinosa</i>       | 30 | LC |
| 123 | <i>Cinchona officinalis</i>    | 29 | NE |
| 124 | <i>Trema integerrima</i>       | 29 | NE |
| 125 | <i>Tabebuia chrysantha</i>     | 28 | NE |
| 126 | <i>Ficus tonduzii standl.</i>  | 27 | NE |
| 127 | <i>Psychotria brachiata</i>    | 27 | NE |
| 128 | <i>Croton sampatik</i>         | 25 | NE |
| 129 | <i>Virola dixonii</i>          | 25 | NE |
| 130 | <i>Ocotea infrafoveolata</i>   | 23 | LC |
| 131 | <i>Prunus opaca</i>            | 22 | LC |
| 132 | <i>Nectandra laurel</i>        | 21 | LC |
| 133 | <i>Prumnopitys montana</i>     | 21 | VU |
| 134 | <i>Virola reidii</i>           | 21 | NE |
| 135 | <i>Pouteria lucuma</i>         | 20 | LC |

|     |                                 |    |    |
|-----|---------------------------------|----|----|
| 136 | <i>Syzygium jambos</i>          | 19 | LC |
| 137 | <i>Hyeronima alchorneoides</i>  | 18 | NE |
| 138 | <i>Maclura tinctoria</i>        | 18 | LC |
| 139 | <i>Persea ferruginea</i>        | 18 | NE |
| 140 | <i>Triplaris cumingiana</i>     | 16 | LC |
| 141 | <i>Lafoensia acuminata</i>      | 14 | LC |
| 142 | <i>Ocotea sericea</i>           | 14 | LC |
| 143 | <i>Trichanthera gigantea</i>    | 14 | LC |
| 144 | <i>Persea rigens</i>            | 12 | LC |
| 145 | <i>Aniba perutilis</i>          | 11 | VU |
| 146 | <i>Brosimum alicastrum</i>      | 11 | LC |
| 147 | <i>Physalis peruviana</i>       | 11 | NE |
| 148 | <i>Acacia glomerosa</i>         | 10 | NE |
| 149 | <i>Lonchocarpus nicou</i>       | 10 | NE |
| 150 | <i>Sapindus saponaria</i>       | 10 | LC |
| 151 | <i>Phytolacca dioica</i>        | 9  | NE |
| 152 | <i>Platymiscium pinnatum</i>    | 9  | NE |
| 153 | <i>Aegiphila alba</i>           | 8  | LC |
| 154 | <i>Euphorbia laurifolia</i>     | 8  | LC |
| 155 | <i>Rhamnus granulosa</i>        | 8  | NE |
| 156 | <i>Aegiphila cuatrecasasii</i>  | 7  | LC |
| 157 | <i>Ficus cuatrecasana</i>       | 7  | NE |
| 158 | <i>Lonchocarpus araripensis</i> | 7  | NE |
| 159 | <i>Mouriri oligantha</i>        | 7  | LC |
| 160 | <i>Vochysia ferruginea</i>      | 7  | LC |
| 161 | <i>Carapa guianensis</i>        | 6  | LC |
| 162 | <i>Styloceras laurifolium</i>   | 6  | LC |
| 163 | <i>Alseis eggersii</i>          | 5  | NE |
| 164 | <i>Centrolobium ochroxylum</i>  | 5  | CR |
| 165 | <i>Otoba gordoniiifolia</i>     | 5  | NE |
| 166 | <i>Pachira rupicola</i>         | 5  | DD |
| 167 | <i>Vitex gigantea</i>           | 5  | LC |
| 168 | <i>Ceiba insignis</i>           | 4  | NE |
| 169 | <i>Dialyanthera parvifolia</i>  | 4  | NE |
| 170 | <i>Leucaena leucocephala</i>    | 4  | NE |
| 171 | <i>Prunus serotina</i>          | 4  | LC |
| 172 | <i>Rheedia edulis</i>           | 4  | NE |
| 173 | <i>Anacardium excelsum</i>      | 3  | NE |
| 174 | <i>Dussia lehmannii</i>         | 3  | LC |
| 175 | <i>Hyeronima oblonga</i>        | 3  | NE |
| 176 | <i>Matisia coloradum</i>        | 3  | EN |
| 177 | <i>Muntingia calabura</i>       | 3  | NE |
| 178 | <i>Myrcia acuminata</i>         | 3  | NE |
| 179 | <i>Pleurothyrium tomiwahlii</i> | 3  | NE |
| 180 | <i>Bursera graveolens</i>       | 2  | LC |
| 181 | <i>Caesalpinia spinosa</i>      | 2  | NE |

|     |                                 |   |    |
|-----|---------------------------------|---|----|
| 182 | <i>Caryodendron amazonicum</i>  | 2 | NE |
| 183 | <i>Castilla tunu</i>            | 2 | LC |
| 184 | <i>Centrolobium paraense</i>    | 2 | NE |
| 185 | <i>Cojoba arborea</i>           | 2 | LC |
| 186 | <i>Geoffroea spinosa</i>        | 2 | LC |
| 187 | <i>Humirastrum procerum</i>     | 2 | VU |
| 188 | <i>Ochroma lagopus</i>          | 2 | NE |
| 189 | <i>Sapium utile</i>             | 2 | NE |
| 190 | <i>Tamarindus indica</i>        | 2 | LC |
| 191 | <i>Weinmannia glabra</i>        | 2 | NE |
| 192 | <i>Albizia multiflora</i>       | 1 | NE |
| 193 | <i>Caesalpinia glabrata</i>     | 1 | NE |
| 194 | <i>Castilla elastica</i>        | 1 | LC |
| 195 | <i>Cordia lutea</i>             | 1 | LC |
| 196 | <i>Cordia macrantha</i>         | 1 | NE |
| 197 | <i>Cynometra bauhiniifolia</i>  | 1 | LC |
| 198 | <i>Gallesia integrifolia</i>    | 1 | LC |
| 199 | <i>Guarea cartaguenya</i>       | 1 | VU |
| 200 | <i>Hyeronima macrocarpa</i>     | 1 | NE |
| 201 | <i>Jacaranda mimosifolia</i>    | 1 | VU |
| 202 | <i>Laguncularia racemosa</i>    | 1 | LC |
| 203 | <i>Myrcianthes hallii</i>       | 1 | NE |
| 204 | <i>Nectandra guararipo</i>      | 1 | VU |
| 205 | <i>Otoba gracilipes</i>         | 1 | NE |
| 206 | <i>Piscidia carthagenensis</i>  | 1 | LC |
| 207 | <i>Pseudobombax millei</i>      | 1 | DD |
| 208 | <i>Swartzia littlei</i>         | 1 | EN |
| 209 | <i>Tabebuia guayacan</i>        | 1 | NE |
| 210 | <i>Terminalia valverdeae</i>    | 1 | NE |
| 211 | <i>Tetragastris varians</i>     | 1 | NE |
| 212 | <i>Triplaris guayaquilensis</i> | 1 | NE |
| 213 | <i>Vochysia macrophylla</i>     | 1 | LC |
| 214 | <i>Ziziphus thyrsoiflora</i>    | 1 | NE |
